# Supplementary material for: Estrogen withdrawal alters oxytocin signaling in the paraventricular hypothalamus and dorsal raphe nucleus to increase postpartum anxiety
Source: bioRxiv or medRxiv preprint supplement (doi:10.1101/2020.06.16.154492), 2020-06-17
Supplement: Supplementary file [file media-1.pdf]

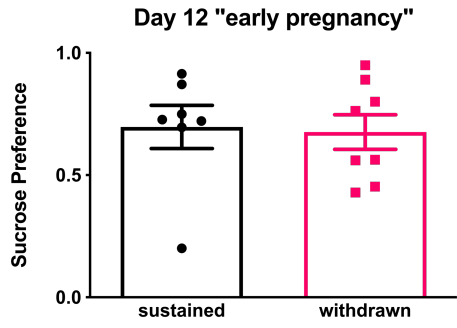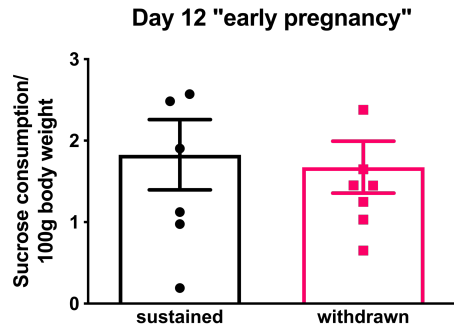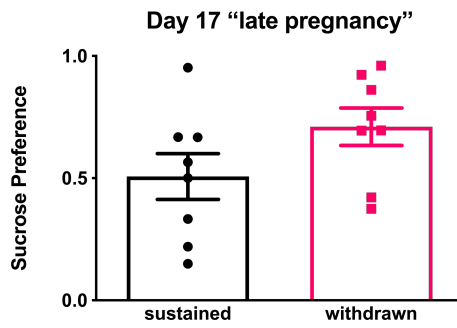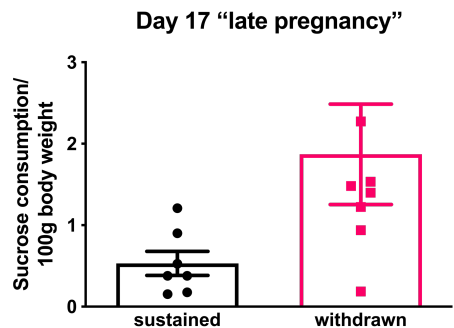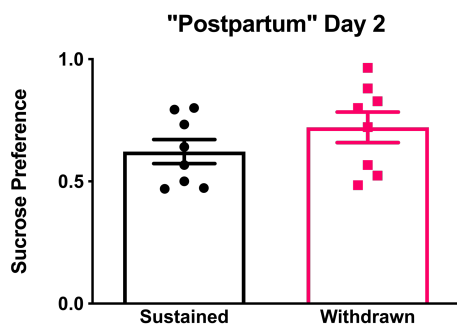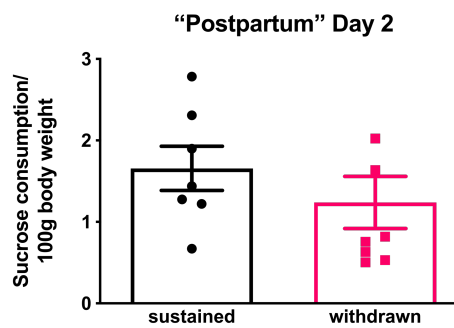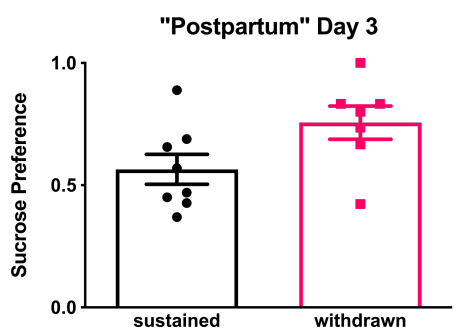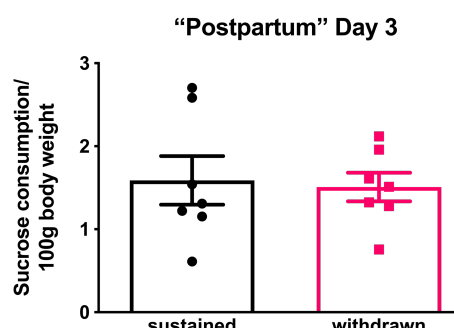

**Supplementary Figure 1: Effect of Estrogen-Withdrawal on Sucrose Preference.** There was no effect of hormone treatment on sucrose preference or sucrose consumption on any day. Data presented as mean  $\pm$  SEM.
